# Supplementary material
Source: PubMed Central journal article supplement (PMC521647)
Supplement: nar_32_17_5260__1.pdf [file nar_32_17_5260__1.pdf]

**Table S1. Presence of proteins of FtsK/HerA superfamily and their interaction partners in archaea and few bacteria**

| Species             | COG0420<br>SbcD/Mre11 | COG0419<br>SbcC/Rad50 | COG0433<br>HerA | COG1674<br>FtsK/SpoIIIE | COG1630<br>NurA | COG4974<br>XerC/D | COG0188<br>ParC/GyrA |
|---------------------|-----------------------|-----------------------|-----------------|-------------------------|-----------------|-------------------|----------------------|
| Aful                | +                     | +                     | +               | -                       | +               | -                 | +                    |
| Halo                | +                     | +                     | +               | -                       | +               | -                 | +                    |
| Mace                | +                     | +                     | +               | -                       | +               | -                 | +                    |
| Phor/Paby/Pfur      | +                     | +                     | +               | -                       | +               | -                 | -                    |
| Mthe                | +                     | +                     | +               | -                       | +               | -                 | -                    |
| Mjan                | +                     | +                     | +               | -                       | +               | -                 | -                    |
| Mkan                | +                     | +                     | +               | -                       | +               | -                 | -                    |
| Tace/Ttvol          | +                     | +                     | +               | -                       | +               | -                 | +                    |
| Pyro                | +                     | +                     | +               | -                       | +               | -                 | -                    |
| Ssol                | +                     | +                     | +               | -                       | +               | -                 | -                    |
| Aper                | +                     | +                     | +               | -                       | +               | -                 | -                    |
| Naeq                | +                     | +                     | +               | -                       | +               | -                 | -                    |
| Aaeo                | +                     | +                     | +               | -                       | +               | -                 | +                    |
| Tmar                | +                     | +                     | +               | -                       | +               | -                 | +                    |
| Syne                | +                     | +                     | +               | - <sup>c</sup>          | +               | -                 | +                    |
| Nost                | +                     | +                     | +               | -                       | +               | -                 | +                    |
| Telo                | +                     | +                     | +               | -                       | +               | -                 | +                    |
| Cau                 | +                     | +                     | +               | -                       | +               | ?                 | ?                    |
| Fnuc                | +                     | +                     | +               | -                       | - <sup>d</sup>  | +                 | +                    |
| Drad/Tthe           | +                     | +                     | +               | +                       | +               | +                 | +                    |
| Bhal                | +                     | -                     | +               | +                       | +               | +                 | +                    |
| Llac                | +                     | +                     | -               | +                       | -               | +                 | +                    |
| Spne                | -                     | -                     | -               | +                       | -               | +                 | +                    |
| Bsub/Lino/Saur/Cace | +                     | +                     | -               | +                       | -               | +                 | +                    |
| Tten                | +                     | +                     | -               | +                       | -               | +                 | +                    |
| Uure                | -                     | -                     | -               | +                       | -               | +                 | +                    |
| Mpne/Mgen           | -                     | -                     | -               | +                       | -               | +                 | +                    |
| Cglu                | +                     | -                     | -               | +                       | -               | +                 | +                    |
| Mtub                | +                     | -                     | + <sup>a</sup>  | +                       | -               | +                 | +                    |
| Ctra                | -                     | -                     | -               | +                       | -               | +                 | +                    |
| Tpal                | +                     | +                     | -               | +                       | -               | +                 | +                    |
| Bbur                | +                     | +                     | -               | +                       | -               | +                 | +                    |
| Ctep                | +                     | +                     | + <sup>b</sup>  | +                       | + <sup>b</sup>  | +                 | +                    |
| Ecol/Ypes           | +                     | +                     | + <sup>a</sup>  | +                       | -               | +                 | +                    |
| Styp                | +                     | +                     | -               | +                       | -               | +                 | +                    |
| Bucn                | -                     | -                     | -               | +                       | -               | +                 | +                    |
| Vcho                | +                     | +                     | -               | +                       | -               | +                 | +                    |
| Paer                | +                     | +                     | + <sup>a</sup>  | +                       | -               | +                 | +                    |
| Hinf                | -                     | -                     | -               | +                       | -               | +                 | +                    |
| Xfa                 | -                     | -                     | -               | +                       | -               | +                 | +                    |
| Nmen/Rsol           | -                     | -                     | -               | +                       | -               | +                 | +                    |
| Hpyl/Cjen           | -                     | -                     | -               | +                       | -               | +                 | +                    |

|                |   |   |                |   |   |   |
|----------------|---|---|----------------|---|---|---|
| Hhep           | - | - | + <sup>b</sup> | + | + | + |
| Smel           | + | - | + <sup>a</sup> | + | - | + |
| Bmel/Mlot/Atum | - | - | + <sup>a</sup> | + | - | + |
| Rpro/Rcon      | - | - | -              | + | - | + |

Note: Archaea are shown by blue, Bacteria – by red; largely complementary patterns of HerA and FtsK / XerC/D and NurA are highlighted.

- a- YjgR family (does not show any conserved gene-neighborhood associations)
- b- CT1915 family (predicted endonuclease of novel restriction-modification system)
- c- Contains a distinct version of the FtsK clade, but not the classical FtsK
- d- Has the predicted Sir2-like nuclease instead of NurA

Species abbreviation is the following: Atum - *Agrobacterium tumefaciens*; Aaeo - *Aquifex aeolicus*; Bhal - *Bacillus halodurans*; Bsub - *Bacillus subtilis*; Bjap - *Bradyrhizobium japonicum*; Bbur - *Borrelia burgdorferi*; Cjej - *Campylobacter jejuni*; Ctra - *Chlamydia trachomatis*; Ctep - *Chlorobium tepidum*; Cglu - *Corynebacterium glutamicum*; Cace - *Clostridium acetobutylicum*; Drad - *Deinococcus radiodurans*; Ecol - *Escherichia coli*; Fnuc - *Fusobacterium nucleatum*; Hinf - *Haemophilus influenzae*; Hhep - *Helicobacter hepaticus*; Hpyl - *Helicobacter pylori*; Llac - *Lactococcus lactis*; Linn - *Listeria innocua*; Mlot - *Mesorhizobium loti*; Mlep - *Mycobacterium leprae*; Mtub - *Mycobacterium tuberculosis*; Mgen - *Mycoplasma genitalium*; Mpne - *Mycoplasma pneumoniae*; Nmen - *Neisseria meningitidis*; Nost - *Nostoc sp.*; Pmar - *Prochlorococcus marinus*; Paer - *Pseudomonas aeruginosa*; Rsol - *Ralstonia solanacearum*; Rcon - *Rickettsia conorii*; Rpro - *Rickettsia prowazekii*; Styp - *Salmonella typhimurium*; Smel - *Sinorhizobium meliloti*; Saur - *Staphylococcus aureus*; Spne - *Streptococcus pneumoniae*; Spyo - *Streptococcus pyogenes*; Syne - *Synechocystis sp.*; Tten - *Thermoanaerobacter tengcongensis*; Telo - *Thermosynechococcus elongatus*; Tmar - *Thermotoga maritima*; Tthe - *Thermus thermophilus*; Tpal - *Treponema pallidum*; Vcho - *Vibrio cholerae*; Xfas - *Xylella fastidiosa*; Ypes - *Yersinia pestis*; Aper - *Aeropyrum pernix*; Aful - *Archaeoglobus fulgidus*; Halo - *Halobacterium sp.*; Mjan - *Methanocaldococcus jannaschii*; Mkan - *Methanopyrus kandleri*; Mace - *Methanosarcina acetivorans*; Mthe - *Methanothermobacter thermautotrophicus*; Nequ - *Nanoarchaeum equitans*; Paer - *Pyrobaculum aerophilum*; Paby - *Pyrococcus abyssi*; Pfur - *Pyrococcus furiosus*; Phor - *Pyrococcus horikoshii*; Ssol - *Sulfolobus solfataricus*; Taci - *Thermoplasma acidophilum*; Tvol - *Thermoplasma volcanium*;
